# Supplementary material
Source: publisher figshare collection journal article supplement (https://asha.figshare.com/articles/dataset/_/19294634)
Supplement: Supplementary file 3 [file 1]

## **Supplemental Material S1. Survey instrument.**

### **Screening Questions**

1. I am a currently enrolled PhD student in the United States: Yes/No
2. I am enrolled in a department within the field of Communication Sciences & Disorders (e.g. Speech-Language-Hearing Sciences, Speech & Hearing Sciences, Rehabilitation Science, etc.): Yes/No
3. Please demonstrate that you are a human by responding to the following question. What is two times three: [short answer]

### **Survey Questions**

4. How many years have you been enrolled in your PhD program?: This is my first year/This is my second year/This is my third year/This is my fourth year/This is my fifth year/This is my sixth year/Seven years or longer

[only if "Seven years or longer"] Please enter the number of years you have been enrolled in your PhD program: [short answer]

5. Please indicate whether you have reached each of the following milestones.

I have completed all of my required coursework: Yes/No

I have completed my comprehensive exams: Yes/No

I have completed my dissertation prospectus: Yes/No

I am working on my dissertation: Yes/No

I have set a dissertation defense date: Yes/No

6. In the last year, my funding situation has changed. (Note: select 'Yes' if your funding has changed in the last year, regardless of reason): Yes/No

7. In the last year, I have been told that my funding situation will change in the future: Yes/No

[only if "Yes" to funding situation change] My funding has been, or will be, reduced: Yes/No

[only if "Yes" to funding situation change] My funding has been, or will be, extended: Yes/No

[only if "Yes" to funding situation change] My funding change is a direct result of the COVID-19 pandemic: No; the funding change is for another reason/Not sure; I am not sure why my funding is changing/Yes; I think the change is due to the COVID-19 pandemic/Yes; I have been told the change is due to the COVID-19 pandemic

8. At the start of your program, how many years of funding were guaranteed in your offer letter?: [short answer]

9. The COVID-19 pandemic has negatively impacted my progress as a PhD student: 1 Strongly Disagree (no negative impact)/2/3/4 Neither Agree nor Disagree/5/6/7 Strongly Agree (significant negative impact)

[only if response 4 or greater] In what ways has the COVID-19 pandemic negatively impacted your academic progress. Please select all that apply: Delay in research projects/Previously proposed research is no longer feasible/Loss of funding/Delayed milestone dates (e.g. delayed defense date, delayed comps date)

10. Please describe how the COVID-19 pandemic has impacted your academic progress: [open response]

11. I am concerned that the COVID-19 pandemic will negatively impact my academic career: 1 Strongly Disagree (no negative impact)/2/3/4 Neither Agree nor Disagree/5/6/7 Strongly Agree (significant negative impact)

[only if response 4 or greater] In what ways do you worry the COVID-19 pandemic will negatively impact your career in the future. Please select all that apply: Funding will run out before I am able to graduate/Reduced productivity/Reduced job opportunities/Reduced opportunities to network/Reduced opportunities to present my work

12. Please describe how you anticipate your academic career will be impacted by the COVID-19 pandemic: [open response]

13. Do you think your graduation date has been delayed due to the COVID-19 pandemic?: Yes/No

[only if "Yes"] How much additional time do you estimate has been added to your program? [short answer]

14. COVID-19 has reduced the likelihood that I will graduate at all: 1 Strongly Disagree/2/3/4 Neither Agree nor Disagree/5/6/7 Strongly Agree

15. I am confident that I will be able to finish my PhD on time: 1 Strongly Disagree/2/3/4 Neither Agree nor Disagree/5/6/7 Strongly Agree

16. I am confident that I will be able to finish my PhD, but it will be later than I expected: 1 Strongly Disagree/2/3/4 Neither Agree nor Disagree/5/6/7 Strongly Agree

17. I am concerned about the impact of the COVID-19 pandemic on the academic job market: 1 Strongly Disagree/2/3/4 Neither Agree nor Disagree/5/6/7 Strongly Agree

18. Including yourself, approximately how many PhD students are currently enrolled in your program?: [short answer]

19. My funding for my PhD program includes: Please select all that apply.: Fellowship funding (e.g. F31 or other personally-awarded fellowship)/Grant funding (e.g. research assistant on advisor's grant)/TA/RA funding (e.g. departmental teaching assistant, departmental research assistant)/Other/I don't have funding

[only if "Other"] Please describe your Other funding.

20. **Before** the COVID-19 pandemic, I felt supported by my advisor: 1 Strongly Disagree/2/3/4 Neither Agree nor Disagree/5/6/7 Strongly Agree

21. **Before** the COVID-19 pandemic, I felt supported by my department: 1 Strongly Disagree/2/3/4 Neither Agree nor Disagree/5/6/7 Strongly Agree

22. Right now, **during** the COVID-19 pandemic, I feel supported by my advisor: 1 Strongly Disagree/2/3/4 Neither Agree nor Disagree/5/6/7 Strongly Agree

23. Right now, **during** the COVID-19 pandemic, I feel supported by my department: 1 Strongly Disagree/2/3/4 Neither Agree nor Disagree/5/6/7 Strongly Agree

24. Have you felt pressured by your advisor and/or department to return to work in person before you felt ready?: I have not been asked to work in person/I am working in person but did not feel pressured by my advisor or department/I am working in person and felt pressured to do so by my advisor or department/I am \*not\* working in person but felt pressured to do so by my advisor or department

25. Because of the COVID-19 pandemic, the amount of time devoted to my teaching responsibilities: Has stayed the same, or about the same/Has decreased/Has increased

[only if "Has increased"] In what ways have your teaching responsibilities increased?  
[open response]

[only if "Has decreased"] In what ways have your teaching responsibilities decreased?  
[open response]

[only if "Has increased" or "Has decreased"] As a result of the change in my teaching responsibilities, my academic progress: Will be about the same/Will be slower/Will be faster

26. Because of the COVID-19 pandemic, the amount of time devoted to my caregiving responsibilities: Has stayed the same, or about the same/Has decreased/Has increased

[only if "Has increased"] In what ways have your caregiving responsibilities increased?  
[open response]

[only if "Has decreased"] In what ways have your caregiving responsibilities decreased?  
[open response]

[only if "Has increased" or "Has decreased"] As a result of the change in my caregiving responsibilities, my academic progress: Will be about the same/Will be slower/Will be faster

27. Please describe how your day-to-day research activities have changed since the start of the COVID-19 pandemic: [open response]

28. At this point in your program, are you still taking classes?: Yes/No

[only if "Yes"] Did your coursework plans change as a result of the COVID-19 pandemic? (e.g. planned coursework no longer offered; change in plan of study due to COVID-19 constraints): Yes/No

[only if "Yes"] Please describe how your coursework plans changed: [open response]

[only if "Yes"] How have your classes changed since the start of the COVID-19 pandemic? My classes are about the same in quality/My classes are lower in quality since the start of the COVID-19 pandemic/My classes are higher in quality since the start of the COVID-19 pandemic

29. What else would you like advisors, departments, and other stakeholders (e.g. ASHA) to know about how the COVID-19 pandemic has impacted your progress as a PhD student?: [open response]

30. What concerns do you have post-graduation, caused by the COVID-19 pandemic?: [open response]

31. Have there been unexpected positive effects of the COVID-19 pandemic on your experience as a PhD student? If so, please describe: [open response]
